# Supplementary material for: Mucosa-associated invariant T cells link intestinal immunity with antibacterial immune defects in alcoholic liver disease
Source: PubMed Central journal article supplement — Gut. 2017 Nov 2;67(5):918–30. doi: 10.1136/gutjnl-2017-314458 (PMC5890654; doi:10.1136/gutjnl-2017-314458), 2017-11-02
Supplement: gutjnl-2017-314458supp001.pdf [file gutjnl-2017-314458supp001.pdf]

1  
2  
3  
4  
5  
6  
7  
8  
9  
10  
11  
12  
13  
14  
15  
16  
17  
18  
19  
20  
21  
22  
23  
24  
25  
26  
27  
28  
29  
30  
31  
32  
33  
34  
35  
36  
37  
38  
39  
40  
41  
42  
43  
44  
45  
46  
47  
48  
49  
50  
51  
52  
53  
54  
55  
56  
57  
58  
59  
60

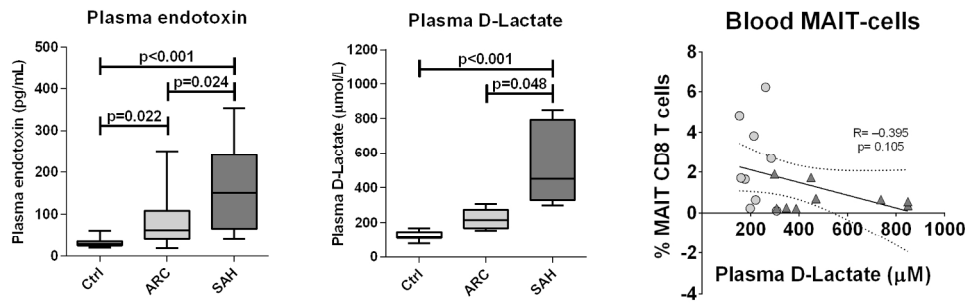

176x57mm (300 x 300 DPI)

Preprint For Review Only

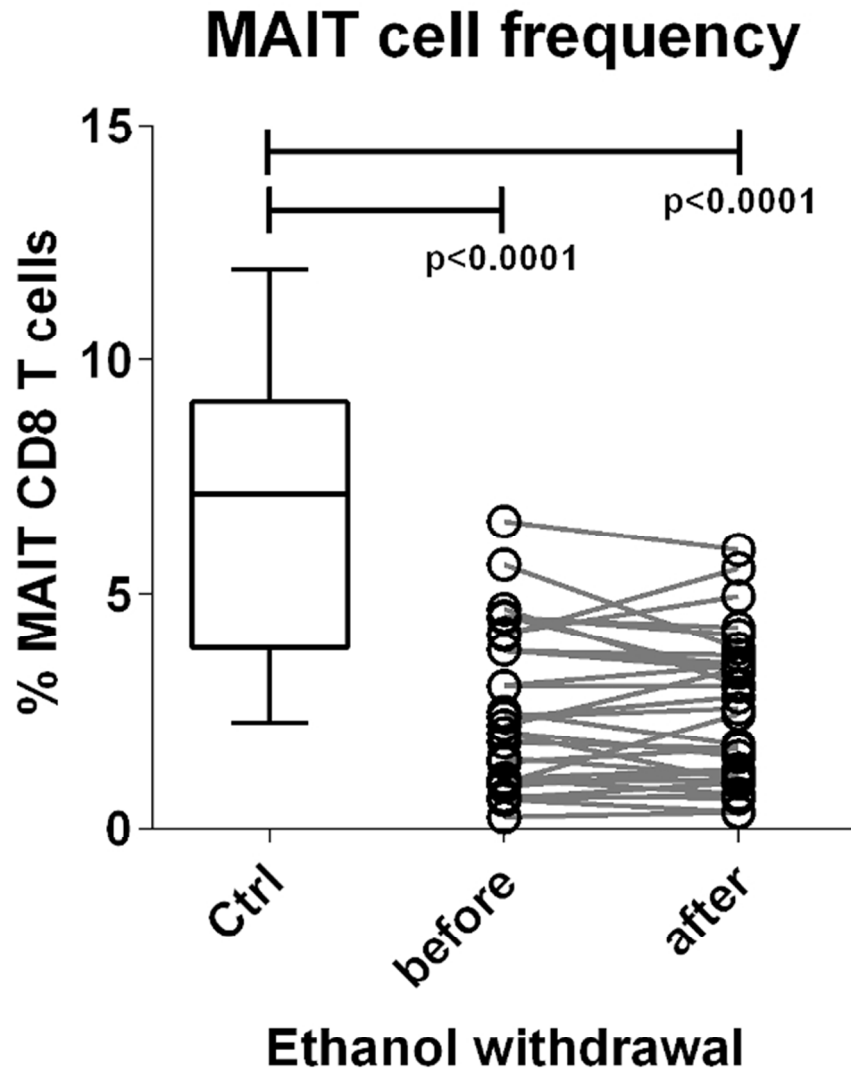

59x72mm (300 x 300 DPI)

AIV

1  
2  
3  
4  
5  
6  
7  
8  
9  
10  
11  
12  
13  
14  
15  
16  
17  
18  
19  
20  
21  
22  
23  
24  
25  
26  
27  
28  
29  
30  
31  
32  
33  
34  
35  
36  
37  
38  
39  
40  
41  
42  
43  
44  
45  
46  
47  
48  
49  
50  
51  
52  
53  
54  
55  
56  
57  
58  
59  
60

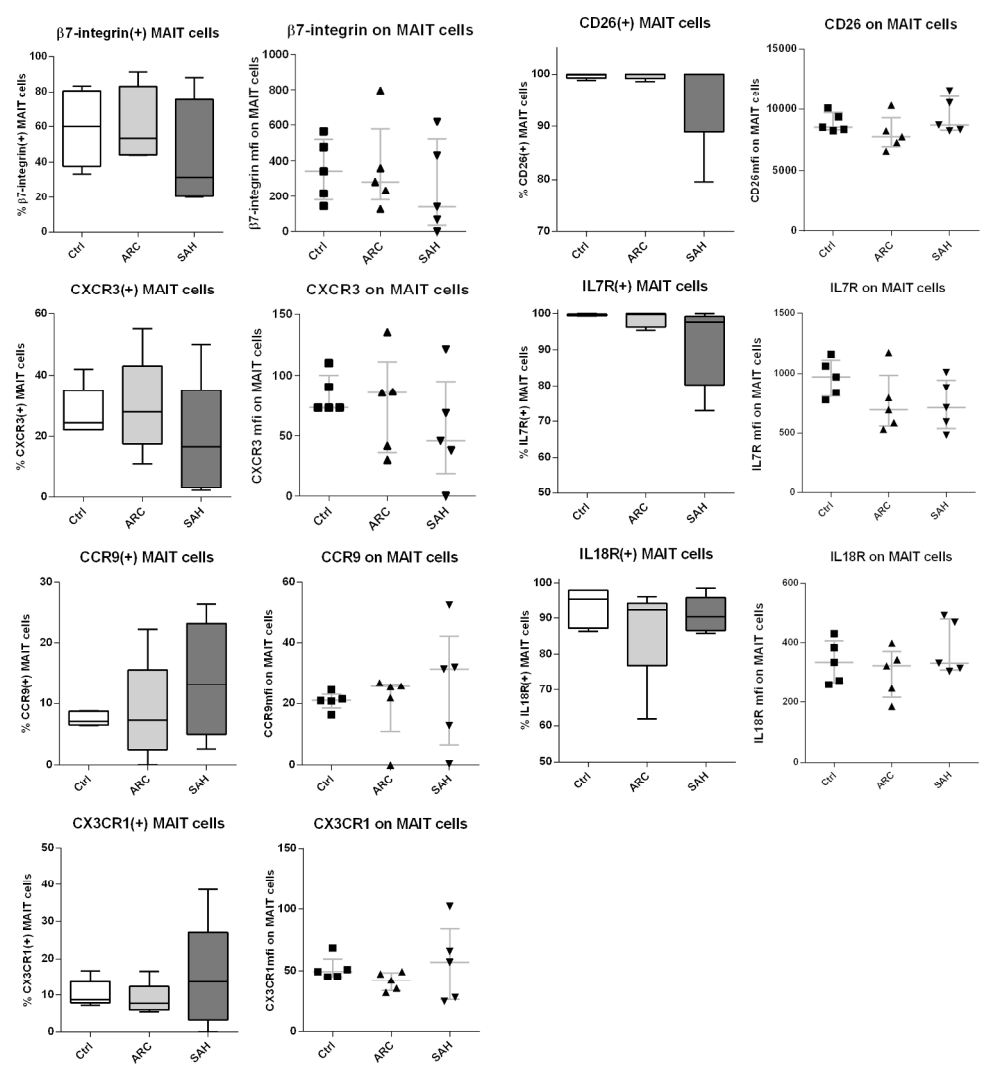

209x226mm (300 x 300 DPI)

Only

1  
2  
3  
4  
5  
6  
7  
8  
9  
10  
11  
12  
13  
14  
15  
16  
17  
18  
19  
20  
21  
22  
23  
24  
25  
26  
27  
28  
29  
30  
31  
32  
33  
34  
35  
36  
37  
38  
39  
40  
41  
42  
43  
44  
45  
46  
47  
48  
49  
50  
51  
52  
53  
54  
55  
56  
57  
58  
59  
60

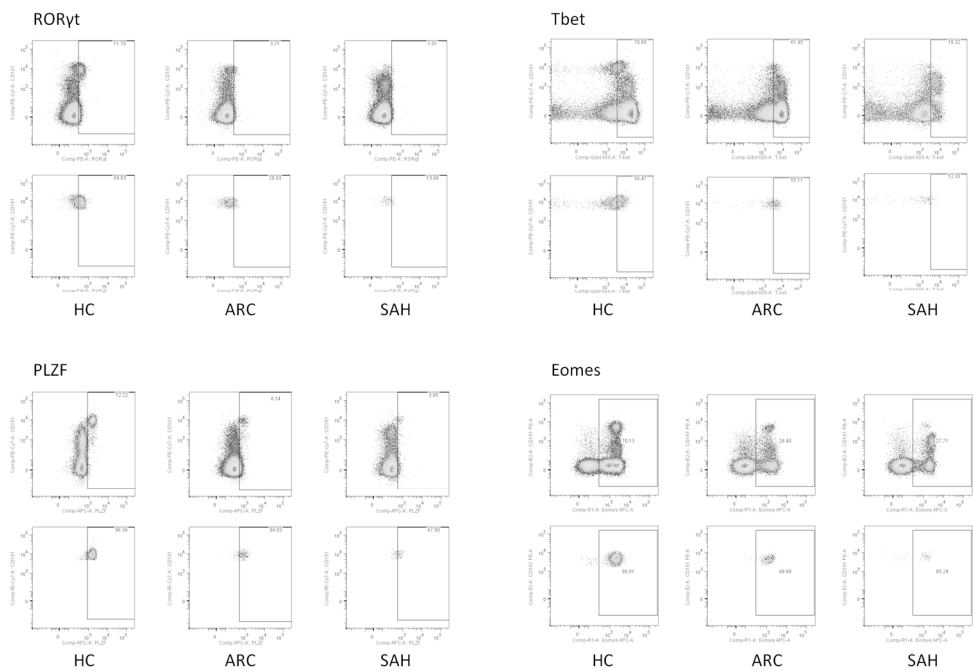

165x115mm (300 x 300 DPI)

Review Only

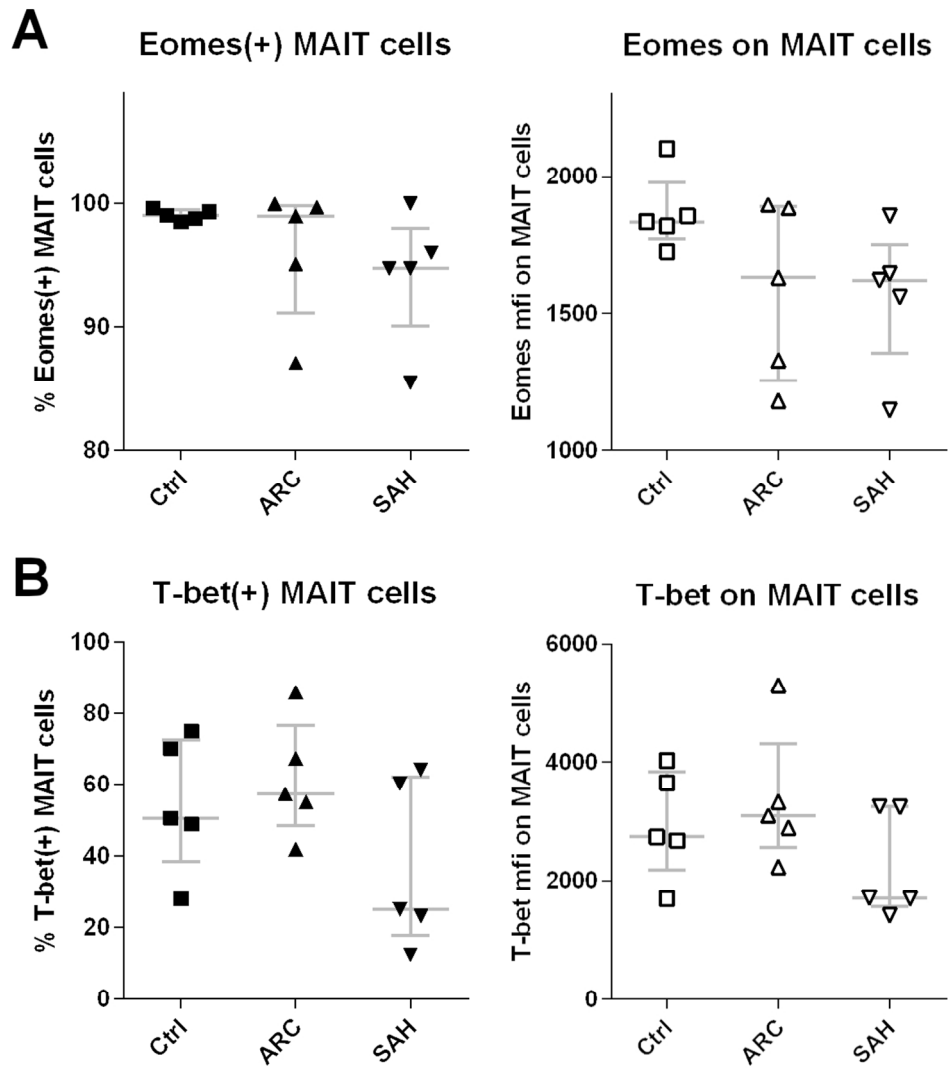

104x116mm (300 x 300 DPI)

Only

1  
2  
3  
4  
5  
6  
7  
8  
9  
10  
11  
12  
13  
14  
15  
16  
17  
18  
19  
20  
21  
22  
23  
24  
25  
26  
27  
28  
29  
30  
31  
32  
33  
34  
35  
36  
37  
38  
39  
40  
41  
42  
43  
44  
45  
46  
47  
48  
49  
50  
51  
52  
53  
54  
55  
56  
57  
58  
59  
60

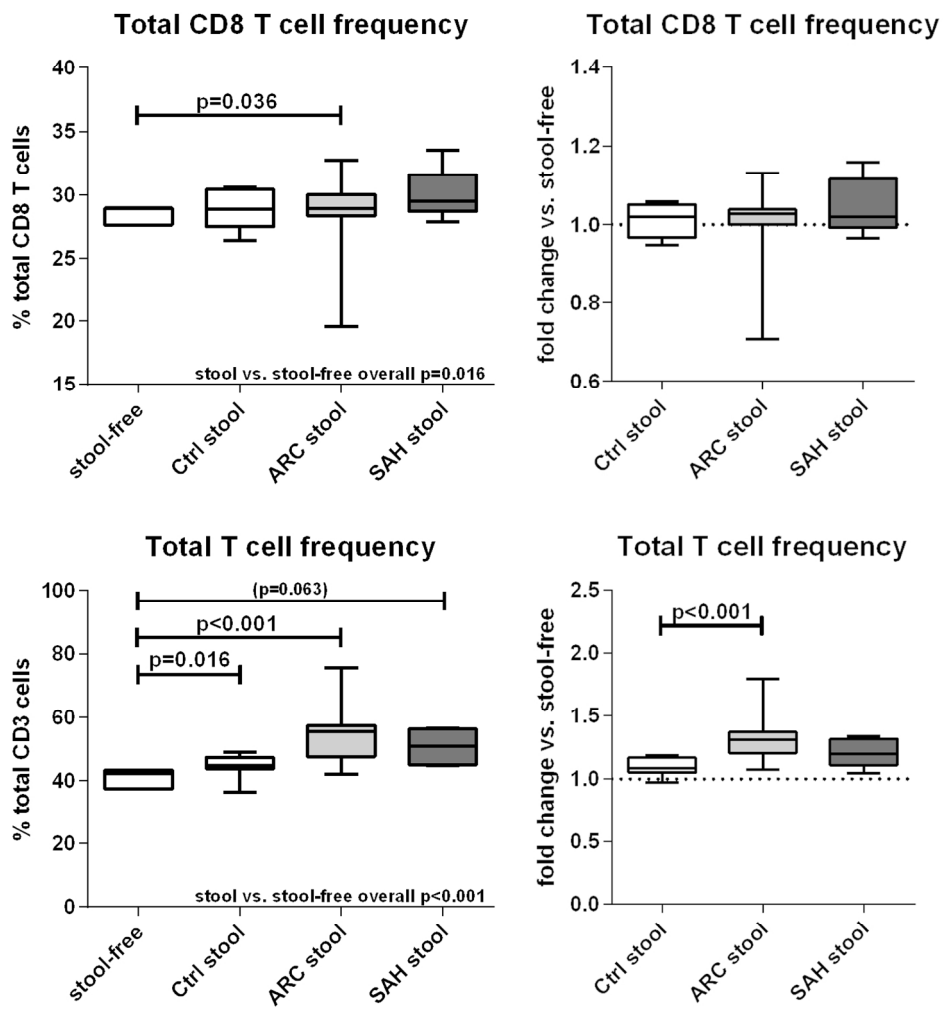

127x136mm (300 x 300 DPI)

Only

| Marker             | Colour               | Clone     | Company         |
|--------------------|----------------------|-----------|-----------------|
| CD3                | Brilliant Violet 510 | UCHT1     | BioLegend       |
|                    | PE-Cy7               | UCHT1     | eBioscience     |
|                    | Pacific Orange       | UCHT1     | Invitrogen      |
| CD4                | Alexa Fluor 700      | RPA-T4    | eBioscience     |
|                    | APC-eFluor 780       | OKT4      | eBioscience     |
|                    | VioGreen             | VIT4      | Miltenyi Biotec |
| CD8a               | PerCP-eFluor 710     | SK1       | eBioscience     |
| CD161              | APC                  | 191B8     | Miltenyi Biotec |
|                    | FITC                 | 191B8     | Miltenyi Biotec |
|                    | PE-Cy7               | HP-3G10   | eBioscience     |
| TCR V $\alpha$ 7.2 | Brilliant Violet 421 | 3C10      | BioLegend       |
|                    | FITC                 | 3C10      | BioLegend       |
|                    | PerCP-Cy5.5          | 3C10      | BioLegend       |
| CD69               | PE                   | FN50      | eBioscience     |
| HLA-DR             | FITC                 | LN3       | eBioscience     |
| PD-1               | PE                   | eBioJ105  | eBioscience     |
| TIM-3              | FITC                 | F38-2E2   | eBioscience     |
| LAG3               | APC                  | 3DS223H   | eBioscience     |
| IFN $\gamma$       | PE                   | 4S.B3     | eBioscience     |
| TNF $\alpha$       | Alexa Fluor 488      | MAB11     | BD Biosciences  |
| IL-17              | Alexa Fluor 647      | SCPL1362  | BD Biosciences  |
| CD107a             | APC                  | H4A3      | BD Biosciences  |
| GrB                | PE                   | GB11      | BD Biosciences  |
| Perf               | Alexa Fluor 488      | dG9       | BD Biosciences  |
| ROR $\gamma$ t     | PE                   | Q21-559   | BD Biosciences  |
| PLZF               | APC                  | 6318100   | R&D Systems     |
| Eomes              | eFluor 660           | WD1928    | eBioscience     |
| T-bet              | Brilliant Violet 605 | 4B10      | BioLegend       |
| Integrin $\beta$ 7 | APC                  | FIB504    | BioLegend       |
| CXCR3              | PE                   | 1C6/CXCR3 | BD Biosciences  |
| CCR9               | PE                   | L053E8    | BioLegend       |
| CX3CR1             | FITC                 | 2A9-1     | BioLegend       |
| CD26               | PE                   | 2A6       | eBioscience     |
| CD57               | FITC                 | HCD57     | BioLegend       |
| CD127              | FITC                 | MB15-18C9 | Miltenyi Biotec |
| IL-18R             | PE                   | H44       | eBioscience     |
| Ki67               | FITC                 | B56       | BD Biosciences  |
| live-dead dye      | near IR              | NA        | Invitrogen      |

Supplementary Table 1

| Common name                | Gene Symbol | Gene Title                                                                               | Representative Public ID | Affymetrix Probe Set ID |
|----------------------------|-------------|------------------------------------------------------------------------------------------|--------------------------|-------------------------|
| Integrin $\alpha$ E, CD103 | ITGAE       | integrin, alpha E (antigen CD103, human mucosal lymphocyte antigen 1; alpha polypeptide) | NM_002208                | 205055_at               |
| Integrin $\alpha$ 4, CD49D | ITGA4       | integrin, alpha 4 (antigen CD49D, alpha 4 subunit of VLA-4 receptor)                     | NM_000885                | 205884_at               |
| Integrin $\alpha$ 4, CD49D | ITGA4       | integrin, alpha 4 (antigen CD49D, alpha 4 subunit of VLA-4 receptor)                     | BG532690                 | 213416_at               |
| CXCL10, IP10               | CXCL10      | chemokine (C-X-C motif) ligand 10                                                        | NM_001565                | 204533_at               |
| MR1                        | MR1         | major histocompatibility complex, class I-related                                        | NM_001531                | 207565_s_at             |
| MR1                        | MR1         | major histocompatibility complex, class I-related                                        | AF010446                 | 210223_s_at             |
| MR1                        | MR1         | major histocompatibility complex, class I-related                                        | AF031469                 | 210224_at               |
| MR1                        | MR1         | major histocompatibility complex, class I-related                                        | AI270356                 | 235352_at               |
| RORyt                      | RORC        | RAR-related orphan receptor C                                                            | NM_005060                | 206419_at               |
| RORyt                      | RORC        | RAR-related orphan receptor C                                                            | AI218580                 | 228806_at               |
| PLZF                       | ZBTB16      | zinc finger and BTB domain containing 16                                                 | NM_006006                | 205883_at               |
| Eomesodermin               | EOMES       | eomesodermin                                                                             | NM_005442                | 231776_at               |
| Galectin 1                 | LGALS1      | lectin, galactoside-binding, soluble, 1                                                  | NM_002305                | 201105_at               |

Supplementary Table 2



## Supplementary materials and methods

### Study ethical approval.

All local recruiting centres had individual ethical approval: the North East London Research Ethics Committee (08/H0702/52); the National Research Ethics Service (NRES) Committees South West (13/SW/0219), Portsmouth South Central (12/SC/0359), London Riverside (135979), London Westminster (12/LO/1417); the Local Research Ethics Committee (LREC) South Birmingham (98/CA5192 and 06/Q2708/11); the Steroids or Pentoxifylline for Alcoholic Hepatitis trial (STOPAH) (09/MRE09/59); the Richmond VA Medical Center IRB (bajaj004).

### Immunophenotyping, intracellular staining and functional apoptosis.

MAIT-cells were identified by flow cytometry using the following panel: CD3/CD4/CD8/TCR\_V $\alpha$ 7.2/CD161. We measured (i) activation markers and immune-checkpoint receptors (CD69/HLA-DR/PD1/TIM3/LAG3); (ii) intracellular cytokines/cytotoxicity markers (IFN $\gamma$ /TNF $\alpha$ /IL17/GranzymeB/Perforin/CD107a); (iv) homing-related markers (beta7-integrin/CCR9/CXCR3/CX3CR1/CD26); (v) cytokine receptors (IL7R/IL18R); (vi) proliferation/senescence markers (Ki67/CD57); (vii) transcription factors (ROR $\gamma$ t/PLZF/Eomes/T-bet). The impact of stool on MAIT-cell apoptosis was assessed by exposing healthy PBMC cultures with FEB (as described above) and measuring apoptosis rates using the Vybrant-FAM Poly-Caspase kit (ThermoFisher-Scientific, UK) following the manufacturer's instructions. Supplementary Table 1 provides the comprehensive list of antibody clones, fluorochromes and manufacturers.

Cells were stained with surface antibodies (20 minutes, 4°C), then either fixed with BD Cytofix buffer and acquired, or fixed/permeabilised with BD Cytofix/Cytoperm (BD Biosciences, UK) (20 minutes, 4°C), stained with intracellular antibodies (30 minutes, 4°C), and finally acquired in FACS-staining buffer (foetal bovine serum 1% in PBS). The cytotoxicity-related marker CD107a was pre-stained for the whole duration of the cultures (allophycocyanin/APC, clone H4A3, BD Biosciences, UK). Samples were acquired on a FACSCanto-II (BD Biosciences, UK).

### Detection of TCR\_V $\alpha$ 7.2 (TRAV1-2) by TaqMan PCR.

RNA from PBMC and colon pinch-biopsies was extracted by firstly solubilising in TriReagent (Ambion/ThermoFisher Scientific, UK). Samples were then extracted with chloroform (15 minutes, RT) followed by isopropanol precipitation (10 minutes, RT), washed with ethanol 75% in RNase-free water, resuspended in RNase-free water and stored at -80°C. RNA concentrations were determined with a NanoDrop spectrophotometer (Thermo Scientific, UK). cDNA was transcribed with RNA QuantiTect Reverse Transcription kit (Qiagen, UK). Real-time TaqMan PCR was performed on an ABI 7500 system (Applied Biosystems/ThermoFisher Scientific, UK) using TaqMan Universal Master Mix II with UNG (Applied Biosystems/ThermoFisher Scientific, UK), 100 ng/reaction of cDNA and the following previously published primers and probe(1,2): TRAV1-2 forward primer: 5'-TCCTTAGTCGGTCTAAAGGGTACAG-3' (18  $\mu$ mol/L); TRAV1-2 probe: 5'-FAM-CTCCAGATGAAAGACTCTGCCTTACCTCTGTGC-NFQ-3' (5  $\mu$ mol/L); Constant-alpha reverse primer: 5'-CATCAGAATCCTTACTTTGTGACACATTTG-3' (18  $\mu$ mol/L). The TaqMan PCR protocol was as follows: 1 cycle at 50°C, 2 minutes (UNG incubation); 1 cycle at 95°C, 10 minutes (polymerase activation); 99 two-step cycles with denaturation at 95°C, 15 seconds, followed by annealing/extension at 60°C, 1 minute. Human large ribosomal protein (RPLP0) was used as reference gene (Applied Biosystems/ThermoFisher Scientific, UK).

### Identification of TCR\_V $\alpha$ 7.2-expressing cells via immunohistochemistry and imaging.

Immunohistochemistry was performed as previously reported(3). In brief, cubes of liver tissue (1-1.5 cm<sup>3</sup>) were cut, snap frozen in liquid nitrogen and stored at -80°C. Tissue was then embedded in Cryoembed (Leica Biosystems, UK) and 7  $\mu$ m-thick sections cut using a cryostat (specimen temperature: -13°C; chamber: -20°C). Sections were air-dried, fixed in acetone onto poly-L-lysine-coated slides (5 minutes), air-dried again and stored at -20°C in the dark until staining. Thawed sections were re-fixed in acetone (5 minutes), washed twice with 0.1% Tween-PBS buffer and endogenous peroxidase activity was quenched in 0.3% hydrogen peroxide-methanol (Sigma Aldrich, UK) (20 minutes). Slides were blocked with casein (1:10 in

1  
2  
3  
4 PBS, Vector Laboratories, Burlingame, CA) (20 minutes), stained with purified primary  
5 antibody anti-TCR\_V $\alpha$ 7.2 (clone 3C10, BioLegend, UK) or IgG1-isotype-control (1 hour, both  
6 at 50  $\mu$ g/mL in PBS) followed by Impress secondary reagent (Vector Laboratories) (30 minutes,  
7 RT), then developed using ImmPACT™ DAB reagent (Vector Laboratories) (10 minutes)  
8 following manufacturer's instructions. Sections were finally counterstained with filtered  
9 haematoxylin (Leica Biosystems) (2 minutes) and developed in water (cold: 2.5 minutes; hot:  
10 2.5 minutes). Once dry, slides were mounted using DPX (Cellpath, UK) and imaged on a Zeiss  
11 Axioskop 40 Microscope with 20x-40x magnification. Parenchymal and portal tract regions  
12 were identified and their areas measured using AxioVision SE64 v4.9. Numbers of  
13 TCR\_V $\alpha$ 7.2(+) cells/mm<sup>2</sup> were counted.  
14  
15  
16  
17  
18  
19  
20  
21  
22  
23  
24  
25  
26  
27  
28  
29  
30  
31  
32  
33  
34  
35  
36  
37  
38  
39  
40  
41  
42  
43  
44  
45  
46  
47  
48  
49  
50  
51  
52  
53  
54  
55  
56  
57  
58  
59  
60

### References for supplementary methods

1. Van Rhijn I, Kasmar A, de Jong A, Gras S, Bhati M, Doorenspleet ME, et al. A conserved human T cell population targets mycobacterial antigens presented by CD1b. *Nat Immunol.* 2013 Jul;14(7):706–13.
2. Tilloy F, Treiner E, Park S-H, Garcia C, Lemonnier F, de la Salle H, et al. An Invariant T Cell Receptor  $\alpha$  Chain Defines a Novel TAP-independent Major Histocompatibility Complex Class Ib–restricted  $\alpha/\beta$  T Cell Subpopulation in Mammals. *J Exp Med.* 1999 Jun 21;189(12):1907–21.
3. Jeffery HC, van Wilgenburg B, Kurioka A, Parekh K, Stirling K, Roberts S, et al. Biliary epithelium and liver B cells exposed to bacteria activate intrahepatic MAIT cells through MR1. *J Hepatol.* 2016 May;64(5):1118–27.

### Supplementary Figure and Supplementary Table legends

Supplementary Figure 1. *Markers of bacterial translocation in ALD patients and correlation with blood MAIT-cells.* Patients with ARC and SAH had increased levels of plasma endotoxin and plasma D-Lactate, two surrogate markers of bacterial translocation and dissemination, compared to controls. We observed a trend for an association between increasing concentrations of plasma D-Lactate and reduced frequencies of blood MAIT-cells in patients overall (ARC, light grey circles; SAH, dark grey triangles).

Box-whiskers plots represent 25<sup>th</sup>/50<sup>th</sup>/75<sup>th</sup> %ile (box) and min/max (whiskers). Controls= white, ARC= light grey, SAH= dark grey.

Supplementary Figure 2. *Short-term alcohol abstinence does not restore blood MAIT-cell frequencies.* In a cohort of excess-alcohol-users undergoing alcohol abstinence, short-term (2-5 days) ethanol withdrawal did not cause quantitative recovery of blood MAIT-cells, which remained as low compared to healthy controls as they were at baseline. All the MAIT-cell frequencies were evaluated as percentages relative to total CD8 T-cells, normalising for any absolute or relative quantitative alteration in total T-cells or total CD8 T-cells which may have occurred as a consequence of excess alcohol consumption.

The box-whiskers plot represents 25<sup>th</sup>/50<sup>th</sup>/75<sup>th</sup> %ile (box) and min/max (whiskers) of healthy controls (white). The line plot represents individual values of excess-alcohol-users on an alcohol abstinence programme (clear circles and lines).

Supplementary Figure 3. *Homing markers on blood MAIT-cells in ALD.* Expression of homing markers CCR9, CX3CR1, beta7-integrins and CXCR3 on blood MAIT-cells were comparable between groups. Blood MAIT-cells from all patients and controls also expressed similar levels of the immunoenzyme CD26 and of the cytokine receptors for IL7 and IL18.

Box-whiskers plots represent 25<sup>th</sup>/50<sup>th</sup>/75<sup>th</sup> %ile (box) and min/max (whiskers). Dot-whiskers plots represent 25<sup>th</sup>/50<sup>th</sup>/75<sup>th</sup> %ile. Controls= white or squares, ARC= light grey or up-triangles, SAH= dark grey or down-triangles.

Supplementary Figure 4. *Representative FACS plots representing expression of transcription factors ROR $\gamma$ t, PLZF, Tbet and Eomes in blood MAIT-cells.* For each transcription factor, representative FACS plots were chosen from one HC, one ARC and one SAH patient. FACS plots on each top row indicate the gating threshold defined on CD161/transcription\_factor biparametric plots. FACS plots on each bottom row indicate the same gating threshold referred to total MAIT-cells only, which was used for the derivation of cell percentages and MFI analysed.

Supplementary Figure 5. *Expression of transcription factors Eomes and T-bet in blood MAIT-cells in ALD.* (A) Expression of transcription factor Eomes on blood MAIT-cells was comparable

1  
2  
3 between groups. (B) Expression of transcription factor T-bet on blood MAIT-cells was also  
4 comparable between groups.

5  
6 Dot-whiskers plots represent 25<sup>th</sup>/50<sup>th</sup>/75<sup>th</sup> %ile. Controls= squares, ARC= up-triangles, SAH=  
7 down-triangles.  
8

9  
10  
11 Supplementary Figure 6. *Exposure of healthy PBMC to crude stool extracts does not affect*  
12 *total T-cells or total CD8(+) T-cells.* Total T-cells and total CD8(+) T-cells were not depleted by  
13 crude stool extracts, indicating lack of non-specific toxicity in this experimental setup.

14  
15 Box-whiskers plots represent 25<sup>th</sup>/50<sup>th</sup>/75<sup>th</sup> %ile (box) and min/max (whiskers). Dotted lines  
16 in box-whiskers plots indicate the no-response threshold for the respective parameter.  
17 Controls= white, ARC= light grey, SAH= dark grey.  
18

19  
20  
21  
22 Supplementary Table 1. *Comprehensive list of all antibody markers, clones, fluorochromes and*  
23 *manufacturers used for flow cytometry.*  
24

25  
26  
27  
28 Supplementary Table 2. *Comprehensive list of all genes of interest queried from publicly*  
29 *available microarray datasets.*  
30
